# Supplementary material
Source: publisher figshare collection journal article supplement (https://acs.figshare.com/ndownloader/files/4618438)
Supplement: Supplementary file 1 [file 4618438]

## Supporting Information Available

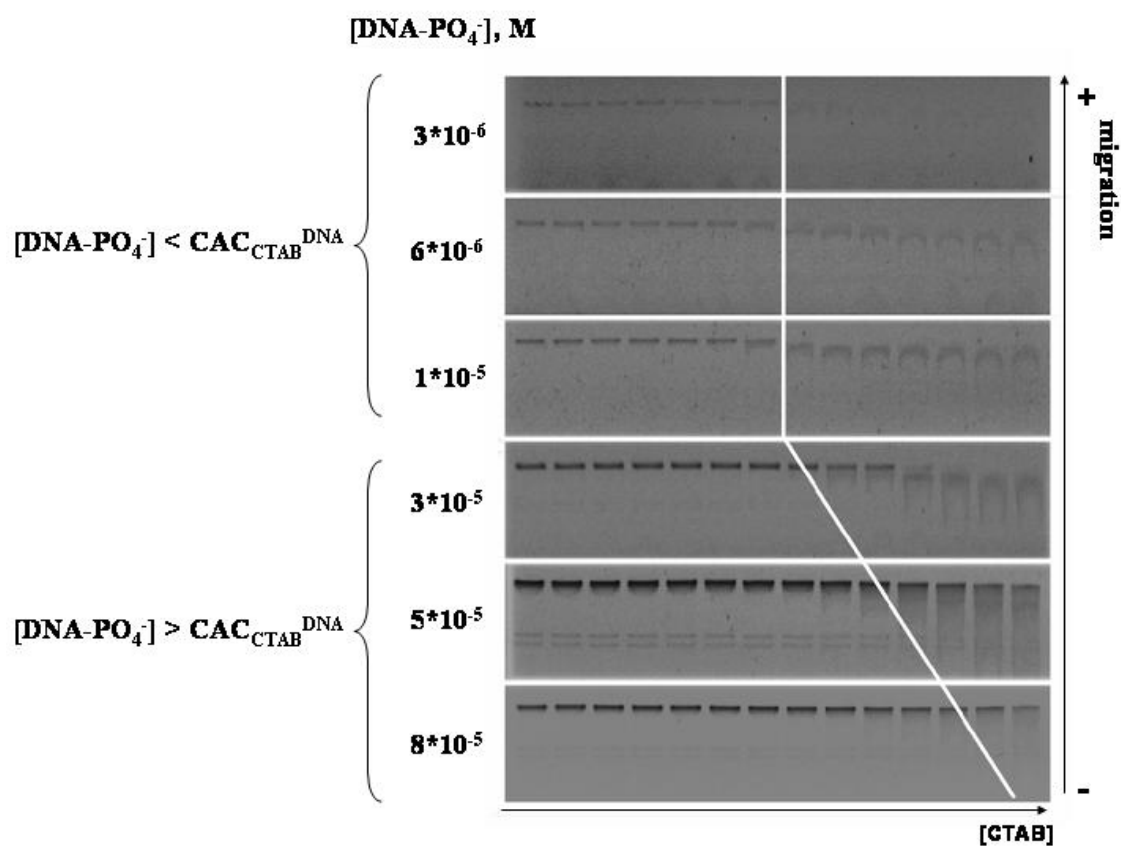

Influence of CTAB on the electrophoretic properties of DNA on the agarose gel at different  $[\text{DNA-PO}_4^-]$ .

The CTAB concentrations from left to right are: 0M;  $5 \cdot 10^{-6}$ M;  $7.5 \cdot 10^{-6}$ M;  $1 \cdot 10^{-5}$ M;  $1.5 \cdot 10^{-5}$ M;  $2 \cdot 10^{-5}$ M;  $3 \cdot 10^{-5}$ M;  $4 \cdot 10^{-5}$ M;  $5 \cdot 10^{-5}$ M;  $6 \cdot 10^{-5}$ M;  $7 \cdot 10^{-5}$ M;  $8 \cdot 10^{-5}$ M;  $9 \cdot 10^{-5}$ M;  $1 \cdot 10^{-4}$ M. 25°C in 30 mM Tris/HCl buffer.
